# Supplementary material for: The Signature Microbiota Drive Rumen Function Shifts in Goat Kids Introduced to Solid Diet Regimes
Source: MDPI journal article supplement (doi:10.3390/microorganisms7110516), 2019-10-31
Supplement: s1 [file s1]

# The Signature Microbiota Drive Rumen Function Shifts in Goat Kids Introduced to Solid Diet Regimes

Xiaokang Lv <sup>1,†</sup>, Jianmin Chai <sup>1,2,†</sup>, Qiyu Diao<sup>1</sup>, Wenqin Huang<sup>1</sup>, Yimin Zhuang<sup>1</sup>, Naifeng Zhang <sup>1,\*</sup>

<sup>1</sup> Feed Research Institute, Chinese Academy of Agricultural Sciences, Key Laboratory of Feed Biotechnology of the Ministry of Agriculture, Beijing, 100081, China; 13121191399@163.com (X.K.L.); jchai@uark.edu (J.M.C.); diaoqiyu@caas.cn (Q.D.); m13121271017@163.com (W.H.); zym1164323345@163.com (Y.Z.)

<sup>2</sup> Department of Animal Science, Division of Agriculture, University of Arkansas, Fayetteville, AR, 72701, USA

\* Correspondence: zhangnaifeng@caas.cn Postal address: No.12 Zhongguancun South St., Haidian District, Beijing, P.R.China 100081, +86(10) 8210 6055

† These authors contributed equally to this work.

## Materials and Methods

### *Goat Kid Management*

Goat kids remained with their mother and received breast milk from 0 to 20 days. During 20 to 60 days of age, they were separated with their dams and the above three kinds of diets were provided to corresponding groups. Other management strategies including vaccination, cleaning and disinfection of pens followed farm normal policy. All animals were fed with milk replacer from 20 to 60 days. Feeding amount of milk replacer were 2% body weight. Goat kids were fed four times a day (0600, 1200, 1800 and 2200) at 20–30 days, and thrice daily at 30–60 days (0600, 1200 and 1800). The milk replacer was dissolved with hot water cooled to 65–70 °C after boiling, and offered to goat kids when it was cooled to 40 ± 1 °C. The ratio of milk replacer to water was 1:6 (weight (g)/ volume (ml)). The milk replacer (China Patent product ZL02128844.5) used in the experiment was provided by Beijing Precision Animal Nutrition Research Center. The concentrate with ingredients of corn, soybean etc. was purchased from Cargill Feed Company (Nanjing, China). The alfalfa pellets purchased from Baofa Agriculture and Animal Husbandry Co. Ltd, (Gansu, China) had the same diameter (4 mm) as the diet concentrate. During the animal trial, all the goat kids had *ad libitum* access to water, the MRC and MCA kids were freely to access concentrate, and the MCA goats had extra free choice of alfalfa pellets. The nutritional levels of milk replacer, concentrate and alfalfa pellets are shown in Table S1.

### *Sample Collection and Chemical Analysis*

Daily feed intakes were recorded in animal trial. Feed samples were collected, dried in a forced-air oven at 65 °C for 48 h and analyzed for crude protein (CP), non-fiber carbohydrate (NFC), and neutral detergent fiber (NDF) according to the Association of Official Analytical Chemists [1]. Then, average daily intake of CP, NFC and NDF were calculated. Only data of table S1 (dietary composition) and table S2 (growth performance) were published in a Chinese journal paper [2], and other data, such as rumen fermentation parameters and microbiome analysis, are detailed in this manuscript.

### *Data Analysis*

Rumen fermentation parameters were shown using bar charts made in R (v3.6.0) by 'ggplot2' package. The ANOVA test was used for significance calculation after detection of homogeneity of variance. After the global test was significant, a post-hoc analysis (Tukey's HSD test) was performed to determine which

group of the independent variable differ from each other group. The remaining fermentation parameters were shown in Table S3.

The Pearson correlation was performed for measurements of association between nutrient intake with rumen fermentation parameters (shown in Table S4), and between phenotypes and alpha diversity (table S5). To better understand the rumen microbial composition in goats introduced different solid diet regime, stacked bar charts of the top 30 genus were made (Figure S1), and significant OTUs were shown in table S6. The p values were calculated by using Kruskal–Wallis test and a post-hoc Dunn Kruskal-Wallis multiple comparison with Bonferroni adjustment to evaluate differences between two groups in R.

A Random Forest classification model was performed to identify the top microbiome signatures to differentiate three supplementary feeding regimes. R package ‘AUCRF’ (v.1.1) was used to process Random Forest model and select optimal variables based on the area-under-the receiver operator characteristic curve (AUC) of the Random Forest method (AUCRF) [3]. The relative abundances of all the microbiota were included for predictors’ selection. The ‘ntree’ parameters was set at 10,000 in the model. For calculation the probability of each selected variable, a 10-fold cross validation analysis and 20 times repetitions of cross validation were performed. The model accuracy, including AUC, sensitivity and specificity of variables, was calculated using the ‘pROC’ package (v.1.13). Thus, variables importance plot was generated based on the importance scores (Mean Decrease in Accuracy, MDA) of optimal features and their boxplots of selected features were drawn in R. Firstly, all 3 groups were analyzed together, and then pair wise comparison. The AUC (area under the curve), specificity, and sensitivity were showed in (Figure S2). The top predictors identified by AUCRF model were displayed in (Table S7), and their abundances were showed in Figure S3-S6.

The Random Forest regression model was used to select the rumen microbiota that were important for average daily intake of major nutrients (i.e., CP, NDF and NFC) and rumen fermentation parameters. The model was run in R software using ‘RandomForest’ package (v 4.6-14). The percent variance explained was reported for the estimation of accuracy of regression model. The top 50 selected features were then analyzed Pearson correlation with those macro indicators respectively. All the Pearson regression results were in File S1.

Predictive function analysis was performed using the PICRUSt algorithm based on the Kyoto Encyclopedia of Genes and Genomes (KEGG) classification using the closed-reference OTUs [4]. The level 3 of functional prediction was shown in Figure S7. The Functional Shifts’ Taxonomic Contributors (Fish Taco) software was used to find the rumen bacteria driving the functional shifts between supplementary regimes in this study. The Fish Taco software running on Python system followed the official pipeline at <http://borenstein-lab.github.io/fishtaco/execution.html>. A taxonomic abundance at OTUs’ level and functional abundance profile at levels 3 from the PICRUSt analysis were used. The primary statistical results were presented in Files S2-S3. In pairwise comparisons, we labeled MRO groups as control and MRC or MCA as case, and tested MRC as control vs MCA as case. Each functional shift was grouped into case-associated with driving case-enrichment or attenuating case-enrichment, and control-associated driving case-enrichment or attenuating case-enrichment. The output results visualization was performed in FishTacoPlot package in R (Version 3.6.0). Except the representative and significant pathway showed in main text, others were disclosed in Figures S8-S9.

**Table S1.** Nutritional components of milk replacer, starter, and alfalfa pellets.

| Items                               | Milk Replacer | Starter Pellets | Alfalfa Pellets |
|-------------------------------------|---------------|-----------------|-----------------|
| Chemical composition, % of DM basis |               |                 |                 |
| DM (%)                              | 95.50         | 95.25           | 95.53           |
| Total Energy (MJ/Kg)                | 20.74         | 18.03           | 17.39           |
| CP (%)                              | 25.52         | 19.63           | 14.77           |
| EE (%)                              | 15.96         | 3.40            | 1.04            |
| NDF (%)                             | ---           | 29.62           | 51.45           |
| ADF (%)                             | ---           | 8.64            | 35.20           |
| Ash (%)                             | 6.54          | 7.99            | 11.98           |
| Ca (%)                              | 1.02          | 0.95            | 0.90            |
| P (%)                               | 0.66          | 0.70            | 0.48            |

DM: Dry matter; CP: Crude protein; EE: Ether extract; NDF: Neutral detergent fibers; ADF: Acid detergent fiber; Ash: Crude ash.

**Table S2.** Effect of early supplementary solid diet on growth performance of goat kids

| Items                                                    | Treatments          |                     |                     | SEM   | p-value |
|----------------------------------------------------------|---------------------|---------------------|---------------------|-------|---------|
|                                                          | MRO                 | MRC                 | MCA                 |       |         |
| Milk replacer intake/(g•d <sup>-1</sup> )                | 130.62              | 107.91              | 119.90              | 4.95  | 0.1696  |
| Concentrate intake/(g•d <sup>-1</sup> )                  | ---                 | 188.18              | 189.56              | 4.82  | 0.8956  |
| Alfalfa pellets intake/(g•d <sup>-1</sup> )              | ---                 | ---                 | 34.34               | ---   | ---     |
| Dry matter intake/(g•d <sup>-1</sup> )                   | 122.47 <sup>c</sup> | 271.50 <sup>b</sup> | 309.97 <sup>a</sup> | 16.12 | <0.0001 |
| Protein intake/(g•d <sup>-1</sup> )                      | 31.33 <sup>c</sup>  | 58.52 <sup>b</sup>  | 66.37 <sup>a</sup>  | 4.07  | <0.0001 |
| NDF-Neutral detergent fiber intake/(g•d <sup>-1</sup> )  | ---                 | 49.25 <sup>b</sup>  | 66.08 <sup>a</sup>  | 3.13  | 0.0004  |
| NFC-Non-fibrous carbohydrate intake/(g•d <sup>-1</sup> ) | 63.82 <sup>c</sup>  | 118.16 <sup>b</sup> | 131.15 <sup>a</sup> | 7.94  | <0.0001 |

MRO = milk replacer, MRC = milk replacer + concentrate, MCA = milk replacer + concentrate + alfalfa; SEM = Standard error of the means. Values with different small letter superscripts in the same row mean significant difference ( $p < 0.05$ ).

Only the data of Table S1 (dietary composition) and Table S2 (growth performance) were published in a Chinese journal article (doi 10.11843/j.issn.0366-6964.2019.05.011), thus the authors have translated them into English since the nutrient intake were used in this draft.

**Table S3.** Effects of early supplementary solid diet on growth performance and rumen fermentation parameters in goat kids

| Items                | Treatments <sup>1</sup> |                     |                     | SEM   | p-value |
|----------------------|-------------------------|---------------------|---------------------|-------|---------|
|                      | MRO                     | MRC                 | MCA                 |       |         |
| Slaughter BW, kg     | 7.01 <sup>b</sup>       | 10.47 <sup>a</sup>  | 10.23 <sup>a</sup>  | 0.41  | <0.0001 |
| Rumen weight, g      | 47.42 <sup>c</sup>      | 126.70 <sup>b</sup> | 175.67 <sup>a</sup> | 14.94 | <0.001  |
| Average daily gain/g | 70.28 <sup>b</sup>      | 123.93 <sup>a</sup> | 126.25 <sup>a</sup> | 5.48  | <0.0001 |
| pH                   | 7.09 <sup>a</sup>       | 5.88 <sup>b</sup>   | 6.01 <sup>b</sup>   | 0.15  | <0.0001 |
| Isobutyrate, mmol/L  | 0.24                    | 0.48                | 0.23                | 0.08  | 0.3589  |
| Isovalerate, mmol/L  | 0.56                    | 0.98                | 0.91                | 0.16  | 0.5470  |
| Valerate, mmol/L     | 0.73 <sup>b</sup>       | 7.34 <sup>a</sup>   | 5.01 <sup>a</sup>   | 0.95  | 0.0045  |
| A:P                  | 2.55                    | 2.23                | 2.20                | 0.13  | 0.5502  |

MRO = milk replacer, MRC = milk replacer + concentrate, MCA = milk replacer + concentrate + alfalfa; SEM = Standard error of the means. BW = body weight; A:P = the ratio of acetate and propionate. Values with different small letter superscripts in the same row mean significant difference ( $p < 0.05$ ).

**Table S4.** Pearson correlation between nutrient and rumen fermentation

| Items              | CP_ADI      |         | NDF_ADI     |         | NFC_ADI     |         | Slaughter body weight |         |
|--------------------|-------------|---------|-------------|---------|-------------|---------|-----------------------|---------|
|                    | coefficient | p-value | coefficient | p-value | coefficient | p-value | coefficient           | p-value |
| pH                 | -0.83       | 0.000   | -0.85       | 0.000   | -0.86       | 0.000   | -0.78                 | 0.000   |
| NH <sub>3</sub> -N | -0.78       | 0.000   | -0.82       | 0.000   | -0.82       | 0.000   | -0.76                 | 0.000   |
| MCP                | 0.80        | 0.000   | 0.88        | 0.000   | 0.86        | 0.000   | 0.82                  | 0.000   |
| acetate            | 0.92        | 0.000   | 0.94        | 0.000   | 0.94        | 0.000   | 0.78                  | 0.000   |
| propionate         | 0.82        | 0.000   | 0.82        | 0.000   | 0.82        | 0.000   | 0.67                  | 0.002   |
| butyrate           | 0.87        | 0.000   | 0.88        | 0.000   | 0.87        | 0.000   | 0.86                  | 0.000   |
| valerate           | 0.60        | 0.009   | 0.65        | 0.004   | 0.66        | 0.003   | 0.76                  | 0.000   |
| Total VFA          | 0.94        | 0.000   | 0.96        | 0.000   | 0.96        | 0.000   | 0.86                  | 0.000   |

CP\_ADI: Crude protein average daily intake; NDF\_ADI: Neutral detergent fibers average daily intake; NFC\_ADI: Non-fibrous carbohydrates average daily intake; Total VFA: Total volatile fatty acids; MCP: Microbial crude protein. A *p* value equal 0 means it was smaller than 0.0005.

**Table S5.** Pearson correlation analysis between phenotypes and Alpha diversity in goat kids.

| Items                 | Shannon Index |         | Observed species |         | Chao1        |         |
|-----------------------|---------------|---------|------------------|---------|--------------|---------|
|                       | coefficients  | p-value | coefficients     | p-value | coefficients | p-value |
| CP                    | -0.04         | 0.880   | -0.65            | 0.003   | -0.66        | 0.003   |
| NFC                   | -0.12         | 0.642   | -0.73            | 0.001   | -0.70        | 0.001   |
| NDF                   | -0.13         | 0.594   | -0.74            | 0.001   | -0.69        | 0.001   |
| acetate               | -0.09         | 0.717   | -0.64            | 0.004   | -0.59        | 0.011   |
| propionate            | -0.10         | 0.687   | -0.58            | 0.011   | -0.57        | 0.014   |
| butyrate              | -0.15         | 0.557   | -0.71            | 0.001   | -0.72        | 0.001   |
| Total VFA             | -0.18         | 0.484   | -0.75            | 0.000   | -0.71        | 0.001   |
| valerate              | -0.58         | 0.012   | -0.88            | 0.000   | -0.78        | 0.000   |
| pH                    | 0.44          | 0.066   | 0.81             | 0.000   | 0.76         | 0.000   |
| NH <sub>3</sub> -N    | 0.15          | 0.562   | 0.63             | 0.005   | 0.63         | 0.005   |
| MCP                   | -0.41         | 0.092   | -0.79            | 0.000   | -0.66        | 0.003   |
| Slaughter body weight | -0.16         | 0.534   | -0.76            | 0.000   | -0.74        | 0.000   |

CP\_ADI: Crude protein average daily intake; NDF\_ADI: Neutral detergent fibers average daily intake; NFC\_ADI: Non-fibrous carbohydrates average daily intake; Total VFA: Total volatile fatty acids; MCP: Microbial crude protein. The *p* value equal to 0 means it was smaller than 0.0005.

**Table S6** the average abundance of 281 significant OTUs

| OTUID                                                | MRO     | MRC     | MCA     | p-value-KWtest |
|------------------------------------------------------|---------|---------|---------|----------------|
| OTU1_ <i>Sphingobacteriaceae</i> _unclassified       | 0.19182 | 0.01601 | 0.00000 | 0.0013         |
| OTU2_ <i>Prevotella</i>                              | 0.00041 | 0.09529 | 0.09803 | 0.0401         |
| OTU4_ <i>Prevotellaceae</i> _unclassified            | 0.11709 | 0.00032 | 0.00036 | 0.0418         |
| OTU5_ <i>Sphingobacteriaceae</i> _unclassified       | 0.11134 | 0.00036 | 0.00002 | 0.0020         |
| OTU6_ <i>Prevotella</i>                              | 0.00005 | 0.01349 | 0.05890 | 0.0022         |
| OTU9_ <i>Succinivibrio</i>                           | 0.00036 | 0.01498 | 0.04738 | 0.0395         |
| OTU10_ <i>Roseburia</i>                              | 0.00003 | 0.04486 | 0.00896 | 0.0264         |
| OTU13_ <i>Prevotella</i>                             | 0.00001 | 0.00414 | 0.04023 | 0.0037         |
| OTU15_ <i>Prevotellaceae</i> _unclassified           | 0.00000 | 0.00291 | 0.03540 | 0.0026         |
| OTU18_ <i>Prevotella</i>                             | 0.01016 | 0.00016 | 0.01923 | 0.0168         |
| OTU20_ <i>Olsenella</i>                              | 0.00010 | 0.02279 | 0.00472 | 0.0192         |
| OTU21_ <i>Prevotella</i>                             | 0.00007 | 0.02081 | 0.00291 | 0.0392         |
| OTU22_ <i>Succiniclasicum</i>                        | 0.00000 | 0.00491 | 0.01817 | 0.0060         |
| OTU24_ <i>Cloacibacillus</i>                         | 0.02164 | 0.00001 | 0.00000 | 0.0008         |
| OTU27_ <i>Prevotellaceae</i> _unclassified           | 0.00001 | 0.00756 | 0.01181 | 0.0307         |
| OTU30_ <i>Prevotellaceae</i> _unclassified           | 0.01838 | 0.00035 | 0.00000 | 0.0287         |
| OTU33_ <i>Bacteroidetes</i> _unclassified            | 0.01775 | 0.00000 | 0.00000 | 0.0003         |
| OTU34_ <i>Ruminococcus</i>                           | 0.00000 | 0.00262 | 0.01489 | 0.0057         |
| OTU36_ <i>Candidatus.Endomicrobium</i> _unclassified | 0.01322 | 0.00298 | 0.00000 | 0.0034         |
| OTU38_ <i>Prevotellaceae</i> _unclassified           | 0.00001 | 0.00982 | 0.00576 | 0.0281         |
| OTU39_ <i>Ruminococcaceae</i> _unclassified          | 0.01473 | 0.00020 | 0.00024 | 0.0026         |
| OTU40_ <i>Bacteroidetes</i> _unclassified            | 0.00000 | 0.00663 | 0.00808 | 0.0079         |
| OTU43_ <i>Bacteroidetes</i> _unclassified            | 0.01254 | 0.00000 | 0.00000 | 0.0345         |
| OTU44_ <i>Prevotellaceae</i> _unclassified           | 0.00000 | 0.00001 | 0.01248 | 0.0249         |
| OTU47_ <i>Porphyromonadaceae</i> _unclassified       | 0.00007 | 0.00952 | 0.00262 | 0.0395         |
| OTU52_ <i>Bacteria</i> _unclassified                 | 0.00002 | 0.01040 | 0.00119 | 0.0189         |
| OTU53_ <i>Lachnospiraceae</i> _unclassified          | 0.00000 | 0.01090 | 0.00021 | 0.0486         |
| OTU54_ <i>Prevotella</i>                             | 0.00000 | 0.00000 | 0.01110 | 0.0085         |
| OTU55_ <i>Sphaerochaeta</i>                          | 0.01053 | 0.00006 | 0.00001 | 0.0011         |
| OTU57_ <i>Prevotella</i>                             | 0.00000 | 0.00774 | 0.00267 | 0.0092         |
| OTU58_ <i>Bacteroidetes</i> _unclassified            | 0.01022 | 0.00000 | 0.00000 | 0.0085         |
| OTU60_ <i>Prevotella</i>                             | 0.00828 | 0.00119 | 0.00047 | 0.0030         |
| OTU62_ <i>Prevotellaceae</i> _unclassified           | 0.00955 | 0.00000 | 0.00008 | 0.0013         |
| OTU63_ <i>Prevotella</i>                             | 0.00003 | 0.00682 | 0.00276 | 0.0366         |
| OTU67_ <i>Treponema</i>                              | 0.00000 | 0.00000 | 0.00906 | 0.0085         |
| OTU71_ <i>Lachnospiraceae</i> _unclassified          | 0.00000 | 0.00020 | 0.00833 | 0.0287         |
| OTU74_ <i>Treponema</i>                              | 0.00001 | 0.00000 | 0.00818 | 0.0055         |
| OTU75_ <i>Ruminococcaceae</i> _unclassified          | 0.00818 | 0.00000 | 0.00000 | 0.0003         |
| OTU77_ <i>Bacteroidetes</i> _unclassified            | 0.00812 | 0.00000 | 0.00000 | 0.0085         |
| OTU79_ <i>Neisseriaceae</i> _unclassified            | 0.00744 | 0.00013 | 0.00031 | 0.0042         |
| OTU83_ <i>Bacteroidales</i> _unclassified            | 0.00005 | 0.00026 | 0.00727 | 0.0053         |
| OTU86_ <i>Pyramidobacter</i>                         | 0.00000 | 0.00354 | 0.00330 | 0.0053         |
| OTU87_ <i>Butyrivibrio</i>                           | 0.00023 | 0.00001 | 0.00657 | 0.0048         |
| OTU89_ <i>Bacteroidetes</i> _unclassified            | 0.00668 | 0.00000 | 0.00000 | 0.0003         |
| OTU90_ <i>Bacteroidetes</i> _unclassified            | 0.00664 | 0.00001 | 0.00000 | 0.0006         |
| OTU93_ <i>Treponema</i>                              | 0.00013 | 0.00000 | 0.00646 | 0.0028         |
| OTU94_ <i>Clostridiales</i> _unclassified            | 0.00646 | 0.00000 | 0.00000 | 0.0003         |
| OTU97_ <i>Clostridiales</i> _unclassified            | 0.00001 | 0.00515 | 0.00097 | 0.0422         |

Table S6. Cont.

|                                             |         |         |         |        |
|---------------------------------------------|---------|---------|---------|--------|
| OTU98_ <i>Anaeroplasma</i>                  | 0.00597 | 0.00000 | 0.00000 | 0.0345 |
| OTU99_ <i>Elusimicrobium</i>                | 0.00596 | 0.00001 | 0.00000 | 0.0006 |
| OTU100_ <i>Prevotellaceae_unclassified</i>  | 0.00001 | 0.00025 | 0.00568 | 0.0161 |
| OTU103_ <i>Prevotellaceae_unclassified</i>  | 0.00479 | 0.00006 | 0.00076 | 0.0448 |
| OTU104_ <i>Prevotella</i>                   | 0.00018 | 0.00010 | 0.00524 | 0.0268 |
| OTU106_ <i>Bacteroidetes_unclassified</i>   | 0.00546 | 0.00000 | 0.00000 | 0.0345 |
| OTU110_ <i>Prevotellaceae_unclassified</i>  | 0.00002 | 0.00075 | 0.00436 | 0.0060 |
| OTU111_ <i>Methanomassiliicoccus</i>        | 0.00499 | 0.00003 | 0.00001 | 0.0017 |
| OTU114_ <i>Megasphaera</i>                  | 0.00000 | 0.00287 | 0.00204 | 0.0046 |
| OTU115_ <i>Fibrobacter</i>                  | 0.00000 | 0.00231 | 0.00257 | 0.0107 |
| OTU119_ <i>Prevotella</i>                   | 0.00437 | 0.00000 | 0.00003 | 0.0006 |
| OTU121_ <i>Bacteroidales_unclassified</i>   | 0.00325 | 0.00031 | 0.00079 | 0.0321 |
| OTU124_ <i>Bacteroidetes_unclassified</i>   | 0.00426 | 0.00000 | 0.00003 | 0.0041 |
| OTU126_ <i>Anaeroplasma</i>                 | 0.00420 | 0.00003 | 0.00001 | 0.0159 |
| OTU127_ <i>Acidaminococcus</i>              | 0.00002 | 0.00175 | 0.00244 | 0.0500 |
| OTU128_ <i>Bacteroidetes_unclassified</i>   | 0.00421 | 0.00000 | 0.00001 | 0.0041 |
| OTU130_ <i>Clostridiales_unclassified</i>   | 0.00420 | 0.00000 | 0.00000 | 0.0018 |
| OTU131_ <i>Bacteroidetes_unclassified</i>   | 0.00412 | 0.00000 | 0.00008 | 0.0057 |
| OTU132_ <i>Pyramidobacter</i>               | 0.00261 | 0.00059 | 0.00097 | 0.0043 |
| OTU134_ <i>Prevotella</i>                   | 0.00404 | 0.00000 | 0.00000 | 0.0018 |
| OTU137_ <i>Escherichia.Shigella</i>         | 0.00195 | 0.00104 | 0.00089 | 0.0362 |
| OTU138_ <i>Prevotella</i>                   | 0.00382 | 0.00000 | 0.00003 | 0.0009 |
| OTU139_ <i>Bacteroidetes_unclassified</i>   | 0.00385 | 0.00000 | 0.00000 | 0.0003 |
| OTU140_ <i>Anaerovibrio</i>                 | 0.00003 | 0.00214 | 0.00157 | 0.0429 |
| OTU141_ <i>Prevotella</i>                   | 0.00369 | 0.00000 | 0.00002 | 0.0057 |
| OTU142_ <i>Bacteroidales_unclassified</i>   | 0.00321 | 0.00049 | 0.00000 | 0.0373 |
| OTU144_ <i>Saccharofermentans</i>           | 0.00331 | 0.00022 | 0.00001 | 0.0408 |
| OTU145_ <i>Ruminococcaceae_unclassified</i> | 0.00000 | 0.00000 | 0.00352 | 0.0085 |
| OTU147_ <i>Bacteroidales_unclassified</i>   | 0.00333 | 0.00000 | 0.00000 | 0.0003 |
| OTU148_ <i>Lachnospiraceae_unclassified</i> | 0.00001 | 0.00251 | 0.00073 | 0.0045 |
| OTU151_ <i>Ruminococcaceae_unclassified</i> | 0.00309 | 0.00001 | 0.00000 | 0.0007 |
| OTU152_ <i>Mitsuokella</i>                  | 0.00002 | 0.00093 | 0.00211 | 0.0117 |
| OTU153_ <i>Firmicutes_unclassified</i>      | 0.00302 | 0.00000 | 0.00000 | 0.0085 |
| OTU154_ <i>Methanomassiliicoccus</i>        | 0.00301 | 0.00001 | 0.00001 | 0.0010 |
| OTU158_ <i>Clostridiales_unclassified</i>   | 0.00285 | 0.00006 | 0.00000 | 0.0009 |
| OTU159_ <i>Lachnospiraceae_unclassified</i> | 0.00290 | 0.00000 | 0.00000 | 0.0085 |
| OTU165_ <i>Prevotellaceae_unclassified</i>  | 0.00000 | 0.00006 | 0.00264 | 0.0057 |
| OTU167_ <i>Veillonellaceae_unclassified</i> | 0.00160 | 0.00093 | 0.00014 | 0.0347 |
| OTU168_ <i>Methanomicrobium</i>             | 0.00250 | 0.00013 | 0.00000 | 0.0009 |
| OTU169_ <i>Bacteroidetes_unclassified</i>   | 0.00261 | 0.00000 | 0.00000 | 0.0003 |
| OTU173_ <i>Megasphaera</i>                  | 0.00000 | 0.00171 | 0.00083 | 0.0447 |
| OTU174_ <i>Bacteroidetes_unclassified</i>   | 0.00243 | 0.00007 | 0.00002 | 0.0227 |
| OTU175_ <i>Prevotella</i>                   | 0.00195 | 0.00000 | 0.00057 | 0.0206 |
| OTU176_ <i>Prevotellaceae_unclassified</i>  | 0.00209 | 0.00035 | 0.00001 | 0.0050 |
| OTU177_ <i>Campylobacter</i>                | 0.00134 | 0.00054 | 0.00054 | 0.0391 |
| OTU178_ <i>Bacteroides</i>                  | 0.00240 | 0.00000 | 0.00000 | 0.0003 |
| OTU182_ <i>Bacteroidetes_unclassified</i>   | 0.00211 | 0.00006 | 0.00015 | 0.0161 |
| OTU183_ <i>Bacteroidetes_unclassified</i>   | 0.00222 | 0.00008 | 0.00001 | 0.0096 |
| OTU186_ <i>Prevotella</i>                   | 0.00001 | 0.00163 | 0.00064 | 0.0075 |

Table S6. Cont.

|                                                     |         |         |         |        |
|-----------------------------------------------------|---------|---------|---------|--------|
| OTU190_ <i>Sphaerochaeta</i>                        | 0.00198 | 0.00022 | 0.00005 | 0.0038 |
| OTU191_ <i>Lachnospiraceae</i> _unclassified        | 0.00001 | 0.00077 | 0.00146 | 0.0162 |
| OTU192_ <i>Methanimicrococcus</i>                   | 0.00220 | 0.00000 | 0.00000 | 0.0003 |
| OTU193_ <i>Bacteroidetes</i> _unclassified          | 0.00215 | 0.00000 | 0.00000 | 0.0018 |
| OTU205_ <i>Firmicutes</i> _unclassified             | 0.00000 | 0.00007 | 0.00176 | 0.0090 |
| OTU206_ <i>Lachnospiraceae</i> _unclassified        | 0.00131 | 0.00012 | 0.00041 | 0.0110 |
| OTU208_ <i>Bacteria</i> _unclassified               | 0.00180 | 0.00000 | 0.00000 | 0.0003 |
| OTU209_ <i>Parabacteroides</i>                      | 0.00175 | 0.00000 | 0.00000 | 0.0085 |
| OTU210_ <i>Desulfovibrio</i>                        | 0.00155 | 0.00012 | 0.00004 | 0.0112 |
| OTU213_ <i>Clostridiales</i> _unclassified          | 0.00166 | 0.00000 | 0.00000 | 0.0345 |
| OTU216_ <i>Ruminococcaceae</i> _unclassified        | 0.00136 | 0.00025 | 0.00000 | 0.0025 |
| OTU217_ <i>Bacteroidetes</i> _unclassified          | 0.00160 | 0.00000 | 0.00000 | 0.0003 |
| OTU218_ <i>Treponema</i>                            | 0.00159 | 0.00000 | 0.00000 | 0.0018 |
| OTU219_ <i>Bacteroidetes</i> _unclassified          | 0.00155 | 0.00003 | 0.00000 | 0.0009 |
| OTU220_ <i>Prevotella</i>                           | 0.00000 | 0.00058 | 0.00099 | 0.0227 |
| OTU221_ <i>Pseudobutyrvibrio</i>                    | 0.00012 | 0.00001 | 0.00142 | 0.0108 |
| OTU222_ <i>Firmicutes</i> _unclassified             | 0.00153 | 0.00000 | 0.00002 | 0.0061 |
| OTU223_ <i>Ruminococcaceae</i> _unclassified        | 0.00155 | 0.00000 | 0.00000 | 0.0018 |
| OTU224_ <i>Prevotella</i>                           | 0.00000 | 0.00090 | 0.00064 | 0.0473 |
| OTU226_ <i>Prevotella</i>                           | 0.00138 | 0.00000 | 0.00015 | 0.0488 |
| OTU228_ <i>Subdivision3_bacteria_incertae_sedis</i> | 0.00151 | 0.00000 | 0.00000 | 0.0018 |
| OTU230_ <i>Bacteroidetes</i> _unclassified          | 0.00001 | 0.00030 | 0.00118 | 0.0448 |
| OTU232_ <i>Lachnospiraceae</i> _unclassified        | 0.00147 | 0.00000 | 0.00000 | 0.0085 |
| OTU239_ <i>Bacteroidales</i> _unclassified          | 0.00001 | 0.00044 | 0.00091 | 0.0295 |
| OTU245_ <i>Clostridiales</i> _unclassified          | 0.00122 | 0.00000 | 0.00000 | 0.0003 |
| OTU246_ <i>Bacteroidetes</i> _unclassified          | 0.00102 | 0.00019 | 0.00001 | 0.0339 |
| OTU248_ <i>Desulfovibrionaceae</i> _unclassified    | 0.00104 | 0.00016 | 0.00000 | 0.0078 |
| OTU249_ <i>Bacteroides</i>                          | 0.00119 | 0.00000 | 0.00000 | 0.0085 |
| OTU252_ <i>Treponema</i>                            | 0.00000 | 0.00117 | 0.00001 | 0.0396 |
| OTU255_ <i>Comamonas</i>                            | 0.00114 | 0.00000 | 0.00001 | 0.0061 |
| OTU258_ <i>Olsenella</i>                            | 0.00000 | 0.00073 | 0.00036 | 0.0101 |
| OTU262_ <i>Firmicutes</i> _unclassified             | 0.00021 | 0.00082 | 0.00000 | 0.0180 |
| OTU263_ <i>Lachnospiraceae</i> _unclassified        | 0.00104 | 0.00000 | 0.00000 | 0.0345 |
| OTU265_ <i>Clostridiales</i> _unclassified          | 0.00102 | 0.00000 | 0.00000 | 0.0085 |
| OTU266_ <i>Porphyromonadaceae</i> _unclassified     | 0.00102 | 0.00000 | 0.00000 | 0.0003 |
| OTU268_ <i>Mitsuokella</i>                          | 0.00001 | 0.00033 | 0.00066 | 0.0377 |
| OTU269_ <i>Ruminococcus</i>                         | 0.00000 | 0.00044 | 0.00057 | 0.0106 |
| OTU270_ <i>Bibersteinia</i>                         | 0.00088 | 0.00004 | 0.00003 | 0.0326 |
| OTU273_ <i>Prevotella</i>                           | 0.00052 | 0.00000 | 0.00041 | 0.0463 |
| OTU275_ <i>Saccharofermentans</i>                   | 0.00093 | 0.00000 | 0.00000 | 0.0018 |
| OTU277_ <i>Lachnospiraceae_incertae_sedis</i>       | 0.00000 | 0.00000 | 0.00092 | 0.0345 |
| OTU278_ <i>Paraprevotella</i>                       | 0.00075 | 0.00006 | 0.00009 | 0.0276 |
| OTU279_ <i>Clostridiales</i> _unclassified          | 0.00090 | 0.00000 | 0.00000 | 0.0003 |
| OTU281_ <i>Bacteroidetes</i> _unclassified          | 0.00089 | 0.00000 | 0.00000 | 0.0003 |
| OTU282_ <i>Lachnospiraceae</i> _unclassified        | 0.00000 | 0.00024 | 0.00064 | 0.0250 |
| OTU287_ <i>Pasteurellaceae</i> _unclassified        | 0.00078 | 0.00004 | 0.00003 | 0.0071 |
| OTU290_ <i>Bacteroidetes</i> _unclassified          | 0.00082 | 0.00000 | 0.00000 | 0.0003 |
| OTU296_ <i>Clostridiales</i> _unclassified          | 0.00075 | 0.00000 | 0.00001 | 0.0006 |
| OTU298_ <i>Pyramidobacter</i>                       | 0.00071 | 0.00004 | 0.00000 | 0.0016 |

Table S6. Cont.

|                                               |         |         |         |        |
|-----------------------------------------------|---------|---------|---------|--------|
| OTU306_ <i>Megasphaera</i>                    | 0.00000 | 0.00023 | 0.00048 | 0.0246 |
| OTU310_ <i>Treponema</i>                      | 0.00068 | 0.00000 | 0.00000 | 0.0018 |
| OTU311_ <i>Clostridiales_unclassified</i>     | 0.00002 | 0.00050 | 0.00015 | 0.0182 |
| OTU313_ <i>Methanomassiliicoccus</i>          | 0.00062 | 0.00003 | 0.00000 | 0.0009 |
| OTU314_ <i>Blautia</i>                        | 0.00000 | 0.00019 | 0.00046 | 0.0179 |
| OTU320_ <i>Alloprevotella</i>                 | 0.00061 | 0.00000 | 0.00000 | 0.0018 |
| OTU322_ <i>Allisonella</i>                    | 0.00000 | 0.00030 | 0.00029 | 0.0248 |
| OTU325_ <i>Bacteroides</i>                    | 0.00037 | 0.00010 | 0.00011 | 0.0177 |
| OTU326_ <i>Ruminococcaceae_unclassified</i>   | 0.00054 | 0.00003 | 0.00000 | 0.0078 |
| OTU327_ <i>Clostridium.XIVa</i>               | 0.00046 | 0.00003 | 0.00007 | 0.0055 |
| OTU328_ <i>Ethanoligenens</i>                 | 0.00056 | 0.00000 | 0.00000 | 0.0085 |
| OTU329_ <i>Methanomassiliicoccus</i>          | 0.00056 | 0.00000 | 0.00000 | 0.0018 |
| OTU330_ <i>Firmicutes_unclassified</i>        | 0.00056 | 0.00000 | 0.00000 | 0.0003 |
| OTU333_ <i>Ruminococcaceae_unclassified</i>   | 0.00036 | 0.00019 | 0.00000 | 0.0138 |
| OTU337_ <i>Bacteroidetes_unclassified</i>     | 0.00050 | 0.00000 | 0.00001 | 0.0249 |
| OTU338_ <i>Prevotella</i>                     | 0.00040 | 0.00012 | 0.00000 | 0.0476 |
| OTU340_ <i>Intestinimonas</i>                 | 0.00024 | 0.00025 | 0.00003 | 0.0221 |
| OTU342_ <i>Lachnospiraceae_incertae_sedis</i> | 0.00037 | 0.00013 | 0.00000 | 0.0137 |
| OTU343_ <i>Prevotellaceae_unclassified</i>    | 0.00050 | 0.00000 | 0.00000 | 0.0018 |
| OTU344_ <i>Firmicutes_unclassified</i>        | 0.00048 | 0.00000 | 0.00000 | 0.0345 |
| OTU346_ <i>Bacteroidetes_unclassified</i>     | 0.00048 | 0.00000 | 0.00000 | 0.0085 |
| OTU348_ <i>Mannheimia</i>                     | 0.00045 | 0.00001 | 0.00000 | 0.0079 |
| OTU349_ <i>Bacteroidetes_unclassified</i>     | 0.00038 | 0.00008 | 0.00000 | 0.0021 |
| OTU352_ <i>Bacteroidetes_unclassified</i>     | 0.00040 | 0.00005 | 0.00000 | 0.0090 |
| OTU353_ <i>Bacteroidetes_unclassified</i>     | 0.00044 | 0.00000 | 0.00000 | 0.0345 |
| OTU360_ <i>Bacteroidetes_unclassified</i>     | 0.00000 | 0.00007 | 0.00036 | 0.0377 |
| OTU363_ <i>Firmicutes_unclassified</i>        | 0.00035 | 0.00000 | 0.00006 | 0.0034 |
| OTU364_ <i>Ruminococcaceae_unclassified</i>   | 0.00017 | 0.00000 | 0.00023 | 0.0181 |
| OTU365_ <i>Neisseriaceae_unclassified</i>     | 0.00038 | 0.00001 | 0.00001 | 0.0010 |
| OTU366_ <i>Bacteroidetes_unclassified</i>     | 0.00039 | 0.00000 | 0.00000 | 0.0082 |
| OTU370_ <i>Clostridiales_unclassified</i>     | 0.00039 | 0.00000 | 0.00000 | 0.0345 |
| OTU371_ <i>Sphaerochaeta</i>                  | 0.00035 | 0.00003 | 0.00001 | 0.0063 |
| OTU372_ <i>Bacteria_unclassified</i>          | 0.00037 | 0.00001 | 0.00000 | 0.0217 |
| OTU373_ <i>Clostridiales_unclassified</i>     | 0.00023 | 0.00015 | 0.00000 | 0.0181 |
| OTU382_ <i>Prevotellaceae_unclassified</i>    | 0.00000 | 0.00000 | 0.00035 | 0.0345 |
| OTU383_ <i>Bacteria_unclassified</i>          | 0.00035 | 0.00000 | 0.00000 | 0.0345 |
| OTU385_ <i>Moraxella</i>                      | 0.00033 | 0.00001 | 0.00000 | 0.0040 |
| OTU387_ <i>Bacteroidetes_unclassified</i>     | 0.00035 | 0.00000 | 0.00000 | 0.0003 |
| OTU389_ <i>Bacteroidetes_unclassified</i>     | 0.00034 | 0.00000 | 0.00000 | 0.0345 |
| OTU391_ <i>Lachnospiraceae_unclassified</i>   | 0.00000 | 0.00022 | 0.00012 | 0.0233 |
| OTU392_ <i>Bilophila</i>                      | 0.00033 | 0.00000 | 0.00000 | 0.0003 |
| OTU393_ <i>Sphaerochaeta</i>                  | 0.00027 | 0.00006 | 0.00000 | 0.0089 |
| OTU396_ <i>Proteobacteria_unclassified</i>    | 0.00000 | 0.00001 | 0.00030 | 0.0061 |
| OTU402_ <i>Firmicutes_unclassified</i>        | 0.00030 | 0.00000 | 0.00000 | 0.0085 |
| OTU403_ <i>Treponema</i>                      | 0.00028 | 0.00002 | 0.00000 | 0.0023 |
| OTU406_ <i>Proteobacteria_unclassified</i>    | 0.00030 | 0.00000 | 0.00000 | 0.0085 |
| OTU411_ <i>Clostridia_unclassified</i>        | 0.00028 | 0.00000 | 0.00000 | 0.0003 |
| OTU412_ <i>Treponema</i>                      | 0.00028 | 0.00000 | 0.00000 | 0.0345 |
| OTU413_ <i>Clostridium.XIVb</i>               | 0.00023 | 0.00003 | 0.00001 | 0.0031 |



Table S6. Cont.

|                                             |         |         |         |        |
|---------------------------------------------|---------|---------|---------|--------|
| OTU415_Dorea                                | 0.00000 | 0.00024 | 0.00003 | 0.0078 |
| OTU416_Bacteroidetes_unclassified           | 0.00027 | 0.00000 | 0.00000 | 0.0085 |
| OTU418_Bacteroidetes_unclassified           | 0.00027 | 0.00000 | 0.00000 | 0.0018 |
| OTU421_Sphaerochaeta                        | 0.00019 | 0.00008 | 0.00000 | 0.0045 |
| OTU422_Porphyromonadaceae_unclassified      | 0.00027 | 0.00000 | 0.00000 | 0.0003 |
| OTU430_Clostridiales_unclassified           | 0.00026 | 0.00000 | 0.00000 | 0.0018 |
| OTU443_Subdivision5_bacteria_incertae_sedis | 0.00023 | 0.00000 | 0.00000 | 0.0018 |
| OTU447_Firmicutes_unclassified              | 0.00019 | 0.00000 | 0.00004 | 0.0037 |
| OTU449_Alysiella                            | 0.00022 | 0.00000 | 0.00000 | 0.0018 |
| OTU454_Bacteroidetes_unclassified           | 0.00021 | 0.00000 | 0.00000 | 0.0018 |
| OTU459_Ruminococcaceae_unclassified         | 0.00021 | 0.00000 | 0.00000 | 0.0018 |
| OTU462_Ruminococcaceae_unclassified         | 0.00001 | 0.00011 | 0.00009 | 0.0236 |
| OTU464_Burkholderiales_unclassified         | 0.00000 | 0.00006 | 0.00015 | 0.0030 |
| OTU472_Ruminococcaceae_unclassified         | 0.00020 | 0.00000 | 0.00000 | 0.0018 |
| OTU477_Ruminococcaceae_unclassified         | 0.00017 | 0.00000 | 0.00002 | 0.0008 |
| OTU479_Subdivision5_bacteria_incertae_sedis | 0.00019 | 0.00000 | 0.00000 | 0.0017 |
| OTU480_Alloprevotella                       | 0.00019 | 0.00000 | 0.00000 | 0.0085 |
| OTU481_Bacteroidetes_unclassified           | 0.00019 | 0.00000 | 0.00000 | 0.0016 |
| OTU484_Kingella                             | 0.00018 | 0.00000 | 0.00000 | 0.0085 |
| OTU487_Firmicutes_unclassified              | 0.00018 | 0.00000 | 0.00000 | 0.0003 |
| OTU489_Bacteria_unclassified                | 0.00017 | 0.00000 | 0.00000 | 0.0345 |
| OTU499_Ruminococcaceae_unclassified         | 0.00017 | 0.00000 | 0.00000 | 0.0345 |
| OTU500_Butyricimonas                        | 0.00015 | 0.00001 | 0.00001 | 0.0266 |
| OTU501_Bacteria_unclassified                | 0.00016 | 0.00000 | 0.00000 | 0.0016 |
| OTU502_Moraxella                            | 0.00016 | 0.00000 | 0.00000 | 0.0018 |
| OTU505_Butyrvibrio                          | 0.00014 | 0.00000 | 0.00001 | 0.0039 |
| OTU506_Bacteria_unclassified                | 0.00015 | 0.00000 | 0.00000 | 0.0003 |
| OTU509_Bacteroidales_unclassified           | 0.00015 | 0.00000 | 0.00000 | 0.0084 |
| OTU517_Treponema                            | 0.00015 | 0.00000 | 0.00000 | 0.0085 |
| OTU518_Bacteroidales_unclassified           | 0.00013 | 0.00001 | 0.00000 | 0.0039 |
| OTU522_Ruminococcaceae_unclassified         | 0.00014 | 0.00000 | 0.00000 | 0.0345 |
| OTU529_Bacteria_unclassified                | 0.00012 | 0.00001 | 0.00000 | 0.0118 |
| OTU531_Ruminococcaceae_unclassified         | 0.00011 | 0.00001 | 0.00001 | 0.0489 |
| OTU532_Bacteroidetes_unclassified           | 0.00000 | 0.00000 | 0.00013 | 0.0342 |
| OTU533_Ruminococcaceae_unclassified         | 0.00013 | 0.00000 | 0.00000 | 0.0345 |
| OTU537_Sphaerochaeta                        | 0.00013 | 0.00000 | 0.00000 | 0.0018 |
| OTU539_Clostridiales_unclassified           | 0.00000 | 0.00004 | 0.00008 | 0.0044 |
| OTU540_Bacteroidetes_unclassified           | 0.00012 | 0.00000 | 0.00001 | 0.0217 |
| OTU541_Parabacteroides                      | 0.00012 | 0.00000 | 0.00000 | 0.0345 |
| OTU545_Clostridiales_unclassified           | 0.00012 | 0.00000 | 0.00000 | 0.0085 |
| OTU546_Oligosphaera                         | 0.00010 | 0.00002 | 0.00001 | 0.0343 |
| OTU549_Alistipes                            | 0.00012 | 0.00000 | 0.00000 | 0.0017 |
| OTU553_Bacteria_unclassified                | 0.00012 | 0.00000 | 0.00000 | 0.0085 |
| OTU554_Bacteroidales_unclassified           | 0.00010 | 0.00001 | 0.00000 | 0.0371 |
| OTU556_Clostridiales_unclassified           | 0.00011 | 0.00001 | 0.00000 | 0.0249 |
| OTU559_Ruminococcaceae_unclassified         | 0.00011 | 0.00000 | 0.00000 | 0.0085 |
| OTU563_Oxalobacteraceae_unclassified        | 0.00011 | 0.00000 | 0.00000 | 0.0082 |
| OTU566_Porphyromonadaceae_unclassified      | 0.00010 | 0.00000 | 0.00001 | 0.0046 |
| OTU569_Clostridiales_unclassified           | 0.00010 | 0.00000 | 0.00001 | 0.0010 |

Table S6. Cont.

|                                                     |         |         |         |        |
|-----------------------------------------------------|---------|---------|---------|--------|
| OTU576_ <i>Chryseobacterium</i>                     | 0.00008 | 0.00001 | 0.00001 | 0.0241 |
| OTU577_ <i>Bacteroidetes</i> _unclassified          | 0.00010 | 0.00000 | 0.00000 | 0.0345 |
| OTU579_ <i>Ruminococcaceae</i> _unclassified        | 0.00009 | 0.00000 | 0.00000 | 0.0345 |
| OTU597_ <i>Clostridiales</i> _unclassified          | 0.00008 | 0.00000 | 0.00000 | 0.0345 |
| OTU598_ <i>Streptococcus</i>                        | 0.00008 | 0.00000 | 0.00000 | 0.0345 |
| OTU601_ <i>Ruminococcaceae</i> _unclassified        | 0.00008 | 0.00000 | 0.00000 | 0.0082 |
| OTU603_ <i>Lachnospiraceae</i> _unclassified        | 0.00006 | 0.00001 | 0.00000 | 0.0101 |
| OTU617_ <i>Bacteroidetes</i> _unclassified          | 0.00008 | 0.00000 | 0.00000 | 0.0017 |
| OTU619_ <i>Pasteurellaceae</i> _unclassified        | 0.00007 | 0.00000 | 0.00001 | 0.0279 |
| OTU624_ <i>Ruminococcaceae</i> _unclassified        | 0.00000 | 0.00000 | 0.00007 | 0.0342 |
| OTU625_ <i>Bacteria</i> _unclassified               | 0.00007 | 0.00000 | 0.00000 | 0.0342 |
| OTU626_ <i>Spirochaetales</i> _unclassified         | 0.00000 | 0.00000 | 0.00007 | 0.0345 |
| OTU629_ <i>Neisseriaceae</i> _unclassified          | 0.00007 | 0.00000 | 0.00000 | 0.0085 |
| OTU630_ <i>Subdivision5_bacteria_incertae_sedis</i> | 0.00007 | 0.00000 | 0.00000 | 0.0345 |
| OTU637_ <i>Porphyromonas</i>                        | 0.00006 | 0.00000 | 0.00001 | 0.0055 |
| OTU639_ <i>Lachnospiraceae</i> _unclassified        | 0.00000 | 0.00000 | 0.00007 | 0.0345 |
| OTU658_ <i>Bacteria</i> _unclassified               | 0.00006 | 0.00000 | 0.00000 | 0.0082 |
| OTU659_ <i>Meganema</i>                             | 0.00004 | 0.00001 | 0.00001 | 0.0491 |
| OTU663_ <i>Neisseriaceae</i> _unclassified          | 0.00006 | 0.00000 | 0.00000 | 0.0345 |
| OTU678_ <i>Lachnospiraceae</i> _unclassified        | 0.00000 | 0.00001 | 0.00005 | 0.0281 |
| OTU688_ <i>Moraxella</i>                            | 0.00005 | 0.00000 | 0.00000 | 0.0345 |
| OTU691_ <i>Bacteria</i> _unclassified               | 0.00005 | 0.00000 | 0.00000 | 0.0345 |
| OTU705_ <i>Pasteurellaceae</i> _unclassified        | 0.00004 | 0.00000 | 0.00000 | 0.0334 |
| OTU709_ <i>Cardiobacteriaceae</i> _unclassified     | 0.00004 | 0.00000 | 0.00000 | 0.0084 |
| OTU720_ <i>Bacteroidetes</i> _unclassified          | 0.00004 | 0.00000 | 0.00000 | 0.0342 |
| OTU729_ <i>Fibrobacter</i>                          | 0.00003 | 0.00000 | 0.00000 | 0.0342 |
| OTU732_ <i>Synergistes</i>                          | 0.00003 | 0.00000 | 0.00000 | 0.0342 |
| OTU767_ <i>Victivallis</i>                          | 0.00003 | 0.00000 | 0.00000 | 0.0342 |
| OTU768_ <i>Clostridiales</i> _unclassified          | 0.00000 | 0.00000 | 0.00003 | 0.0342 |
| OTU770_ <i>Streptococcus</i>                        | 0.00003 | 0.00000 | 0.00000 | 0.0342 |
| OTU771_ <i>Peptostreptococcus</i>                   | 0.00003 | 0.00000 | 0.00000 | 0.0342 |
| OTU779_ <i>Coriobacteriaceae</i> _unclassified      | 0.00003 | 0.00000 | 0.00000 | 0.0078 |
| OTU782_ <i>Brevundimonas</i>                        | 0.00003 | 0.00000 | 0.00000 | 0.0078 |
| OTU783_ <i>Porphyromonas</i>                        | 0.00003 | 0.00000 | 0.00000 | 0.0078 |
| OTU807_ <i>Corynebacterium</i>                      | 0.00002 | 0.00000 | 0.00000 | 0.0334 |
| OTU813_ <i>Lachnospiraceae</i> _unclassified        | 0.00002 | 0.00000 | 0.00000 | 0.0334 |

**Table S7** the top 50 features selected of RandomForest classification model based on MDA

| Order<br>based on<br>MDA | MRO-MRC-MCA                                               | MRO-MRC                                                   | MRO-MCA                                                   | MRC-MCA                                                |
|--------------------------|-----------------------------------------------------------|-----------------------------------------------------------|-----------------------------------------------------------|--------------------------------------------------------|
| 1                        | OTU93_ <i>Treponema</i>                                   | OTU365_ <i>Neisseriaceae_</i><br>unclassified             | OTU216_ <i>Ruminococcac</i><br><i>eae_unclassified</i>    | OTU74_ <i>Treponema</i>                                |
| 2                        | OTU87_ <i>Butyrivibrio</i>                                | OTU296_ <i>Clostridiales_</i><br>unclassified             | OTU464_ <i>Burkholderiale</i><br><i>s_unclassified</i>    | OTU104_ <i>Prevotella</i>                              |
| 3                        | OTU539_ <i>Clostridiales_</i><br>unclassified             | OTU5_ <i>Sphingobacteriac</i><br><i>eae_unclassified</i>  | OTU60_ <i>Prevotella</i>                                  | OTU396_ <i>Proteobacter</i><br><i>ia_unclassified</i>  |
| 4                        | OTU330_ <i>Firmicutes_un</i><br>classified                | OTU148_ <i>Lachnospiracea</i><br><i>e_unclassified</i>    | OTU22_ <i>Succiniclasticu</i><br><i>m</i>                 | OTU539_ <i>Clostridiales</i><br><i>_unclassified</i>   |
| 5                        | OTU313_ <i>Methanomassi</i><br><i>liicoccus</i>           | OTU290_ <i>Bacteroidetes_</i><br>unclassified             | OTU422_ <i>Porphyromona</i><br><i>daceae_unclassified</i> | OTU87_ <i>Butyrivibrio</i>                             |
| 6                        | OTU83_ <i>Bacteroidales_u</i><br>nclassified              | OTU18_ <i>Prevotella</i>                                  | OTU39_ <i>Ruminococcacea</i><br><i>e_unclassified</i>     | OTU83_ <i>Bacteroidales</i><br><i>_unclassified</i>    |
| 7                        | OTU89_ <i>Bacteroidetes_u</i><br>nclassified              | OTU111_ <i>Methanomassi</i><br><i>liicoccus</i>           | OTU94_ <i>Clostridiales_u</i><br>nclassified              | OTU42_ <i>Prevotella</i>                               |
| 8                        | OTU396_ <i>Proteobacteria</i><br><i>_unclassified</i>     | OTU411_ <i>Clostridia_</i> unc<br>lassified               | OTU178_ <i>Bacteroides</i>                                | OTU93_ <i>Treponema</i>                                |
| 9                        | OTU75_ <i>Ruminococcacea</i><br><i>e_unclassified</i>     | OTU569_ <i>Clostridiales_</i><br>unclassified             | OTU147_ <i>Bacteroidales_</i><br>unclassified             | OTU221_ <i>Pseudobutyr</i><br><i>ivibrio</i>           |
| 10                       | OTU24_ <i>Cloacibacillus</i>                              | OTU119_ <i>Prevotella</i>                                 | OTU290_ <i>Bacteroidetes_</i><br>unclassified             | OTU110_ <i>Prevotellace</i><br><i>ae_unclassified</i>  |
| 11                       | OTU154_ <i>Methanomassi</i><br><i>liicoccus</i>           | OTU487_ <i>Firmicutes_un</i><br>classified                | OTU349_ <i>Bacteroidetes_</i><br>unclassified             | OTU599_ <i>Spartobacter</i><br><i>ia_unclassified</i>  |
| 12                       | OTU387_ <i>Bacteroidetes_</i><br>unclassified             | OTU447_ <i>Firmicutes_un</i><br>classified                | OTU539_ <i>Clostridiales_</i><br>unclassified             | OTU100_ <i>Prevotellace</i><br><i>ae_unclassified</i>  |
| 13                       | OTU217_ <i>Bacteroidetes_</i><br>unclassified             | OTU281_ <i>Bacteroidetes_</i><br>unclassified             | OTU55_ <i>Sphaerochaeta</i>                               | OTU163_ <i>Prevotellace</i><br><i>ae_unclassified</i>  |
| 14                       | OTU104_ <i>Prevotella</i>                                 | OTU422_ <i>Porphyromona</i><br><i>daceae_unclassified</i> | OTU154_ <i>Methanomassi</i><br><i>liicoccus</i>           | OTU54_ <i>Prevotella</i>                               |
| 15                       | OTU422_ <i>Porphyromona</i><br><i>daceae_unclassified</i> | OTU154_ <i>Methanomassi</i><br><i>liicoccus</i>           | OTU330_ <i>Firmicutes_un</i><br>classified                | OTU432_ <i>Lachnospira</i><br><i>ceae_unclassified</i> |
| 16                       | OTU74_ <i>Treponema</i>                                   | OTU217_ <i>Bacteroidetes_</i><br>unclassified             | OTU208_ <i>Bacteria_uncl</i><br>assified                  | OTU88_ <i>Treponema</i>                                |
| 17                       | OTU178_ <i>Bacteroides</i>                                | OTU79_ <i>Neisseriaceae_u</i><br>nclassified              | OTU313_ <i>Methanomassi</i><br><i>liicoccus</i>           | OTU67_ <i>Treponema</i>                                |
| 18                       | OTU5_ <i>Sphingobacteriac</i><br><i>eae_unclassified</i>  | OTU24_ <i>Cloacibacillus</i>                              | OTU89_ <i>Bacteroidetes_u</i><br>nclassified              | OTU643_ <i>Neisseria</i>                               |
| 19                       | OTU290_ <i>Bacteroidetes_</i><br>unclassified             | OTU208_ <i>Bacteria_uncl</i><br>assified                  | OTU411_ <i>Clostridia_unc</i><br>lassified                | OTU177_ <i>Campylobact</i><br><i>er</i>                |
| 20                       | OTU55_ <i>Sphaerochaeta</i>                               | OTU114_ <i>Megasphaera</i>                                | OTU24_ <i>Cloacibacillus</i>                              | OTU145_ <i>Ruminococc</i><br><i>aceae_unclassified</i> |
| 21                       | OTU39_ <i>Ruminococcacea</i><br><i>e_unclassified</i>     | OTU506_ <i>Bacteria_uncl</i><br>assified                  | OTU413_ <i>Clostridium.Xl</i><br><i>Vb</i>                | OTU205_ <i>Firmicutes_</i><br>unclassified             |
| 22                       | OTU90_ <i>Bacteroidetes_u</i><br>nclassified              | OTU330_ <i>Firmicutes_un</i><br>classified                | OTU296_ <i>Clostridiales_</i><br>unclassified             | OTU273_ <i>Prevotella</i>                              |
| 23                       | OTU94_ <i>Clostridiales_u</i><br>nclassified              | OTU75_ <i>Ruminococcacea</i><br><i>e_unclassified</i>     | OTU403_ <i>Treponema</i>                                  | OTU15_ <i>Prevotellaceae</i><br><i>_unclassified</i>   |

Table S7. Cont.

|    |                                        |                                        |                                        |                                     |
|----|----------------------------------------|----------------------------------------|----------------------------------------|-------------------------------------|
| 24 | OTU365_Neisseriaceae_unclassified      | OTU94_Clostridiales_unclassified       | OTU266_Porphyromonadaceae_unclassified | OTU314_Blautia                      |
| 25 | OTU411_Clostridia_unclassified         | OTU313_Methanomassiliicoccus           | OTU298_Pyramidobacter                  | OTU48_Treponema                     |
| 26 | OTU296_Clostridiales_unclassified      | OTU387_Bacteroidetes_unclassified      | OTU5_Sphingobacteriaceae_unclassified  | OTU591_Atopobium                    |
| 27 | OTU487_Firmicutes_unclassified         | OTU147_Bacteroidales_unclassified      | OTU281_Bacteroidetes_unclassified      | OTU415_Dorea                        |
| 28 | OTU147_Bacteroidales_unclassified      | OTU178_Bacteroides                     | OTU1_Sphingobacteriaceae_unclassified  | OTU123_Prevotella                   |
| 29 | OTU99_Elusimicrobium                   | OTU139_Bacteroidetes_unclassified      | OTU151_Ruminococcaceae_unclassified    | OTU52_Bacteria_unclassified         |
| 30 | OTU392_Bilophila                       | OTU477_Ruminococcaceae_unclassified    | OTU111_Methanomassiliicoccus           | OTU171_Olsenella                    |
| 31 | OTU506_Bacteria_unclassified           | OTU93_Treponema                        | OTU119_Prevotella                      | OTU143_Fibrobacter                  |
| 32 | OTU169_Bacteroidetes_unclassified      | OTU363_Firmicutes_unclassified         | OTU217_Bacteroidetes_unclassified      | OTU6_Prevotella                     |
| 33 | OTU119_Prevotella                      | OTU39_Ruminococcaceae_unclassified     | OTU34_Ruminococcus                     | OTU611_Bacteria_unclassified        |
| 34 | OTU279_Clostridiales_unclassified      | OTU169_Bacteroidetes_unclassified      | OTU365_Neisseriaceae_unclassified      | OTU115_Fibrobacter                  |
| 35 | OTU139_Bacteroidetes_unclassified      | OTU62_Prevotellaceae_unclassified      | OTU387_Bacteroidetes_unclassified      | OTU165_Prevotellaceae_unclassified  |
| 36 | OTU221_Pseudobutyribrio                | OTU279_Clostridiales_unclassified      | OTU83_Bacteroidales_unclassified       | OTU29_Prevotella                    |
| 37 | OTU208_Bacteria_unclassified           | OTU266_Porphyromonadaceae_unclassified | OTU392_Bilophila                       | OTU96_Alloprevotella                |
| 38 | OTU266_Porphyromonadaceae_unclassified | OTU33_Bacteroidetes_unclassified       | OTU6_Prevotella                        | OTU86_Pyramidobacter                |
| 39 | OTU33_Bacteroidetes_unclassified       | OTU392_Bilophila                       | OTU219_Bacteroidetes_unclassified      | OTU91_Prevotellaceae_unclassified   |
| 40 | OTU245_Clostridiales_unclassified      | OTU89_Bacteroidetes_unclassified       | OTU33_Bacteroidetes_unclassified       | OTU140_Anaerovibrio                 |
| 41 | OTU110_Prevotellaceae_unclassified     | OTU86_Pyramidobacter                   | OTU75_Ruminococcaceae_unclassified     | OTU768_Clostridiales_unclassified   |
| 42 | OTU111_Methanomassiliicoccus           | OTU99_Elusimicrobium                   | OTU192_Methanimicrococcus              | OTU698_Parasutterella               |
| 43 | OTU281_Bacteroidetes_unclassified      | OTU245_Clostridiales_unclassified      | OTU190_Sphaerochaeta                   | OTU313_Methanomassiliicoccus        |
| 44 | OTU192_Methanimicrococcus              | OTU55_Sphaerochaeta                    | OTU421_Sphaerochaeta                   | OTU626_Spirochaetales_unclassified  |
| 45 | OTU42_Prevotella                       | OTU90_Bacteroidetes_unclassified       | OTU13_Prevotella                       | OTU78_Bacteroidales_unclassified    |
| 46 | OTU79_Neisseriaceae_unclassified       | OTU192_Methanimicrococcus              | OTU115_Fibrobacter                     | OTU524_Lachnospiraceae_unclassified |
| 47 | OTU477_Ruminococcaceae_unclassified    | OTU138_Prevotella                      | OTU168_Methanomicrobium                | OTU464_Burkholderiales_unclassified |
| 48 | OTU6_Prevotella                        | OTU168_Methanomicrobium                | OTU487_Firmicutes_unclassified         | OTU66_Treponema                     |

**Table S7. Cont.**

|    |                                           |                           |                                          |                                             |
|----|-------------------------------------------|---------------------------|------------------------------------------|---------------------------------------------|
| 49 | OTU60_ <i>Prevotella</i>                  | OTU60_ <i>Prevotella</i>  | OTU506_ <i>Bacteria_unclassified</i>     | OTU596_ <i>Ruminococcaceae_unclassified</i> |
| 50 | OTU158_ <i>Clostridiales_unclassified</i> | OTU186_ <i>Prevotella</i> | OTU40_ <i>Bacteroidetes_unclassified</i> | OTU382_ <i>Prevotellaceae_unclassified</i>  |

**Table S8.** The prediction accuracy of Random Forest regression model

| Items            | Prediction accuracy (%) |
|------------------|-------------------------|
| CP               | 73.01                   |
| NDF              | 73.79                   |
| NFC              | 75.81                   |
| acetate          | 61.40                   |
| propionate       | 40.95                   |
| butyrate         | 57.03                   |
| valerate         | 73.05                   |
| Total VFA        | 70.06                   |
| Slaughter weight | 69.50                   |

The Random Forest regression model were used to select the rumen bacteria that were important for intake of major nutrient (CP, NDF and NFC). The model was run in R software using randomForest package (v 4.6-14) with 10000 ntrees. The percent variance explained was reported for the estimation of accuracy of regression model. CP: Crude protein average daily intake; NDF: Neutral detergent fibers average daily intake; NFC: Non-fibrous carbohydrates average daily intake, Total VFA: Total volatile fatty acids.

## Supplementary Figures

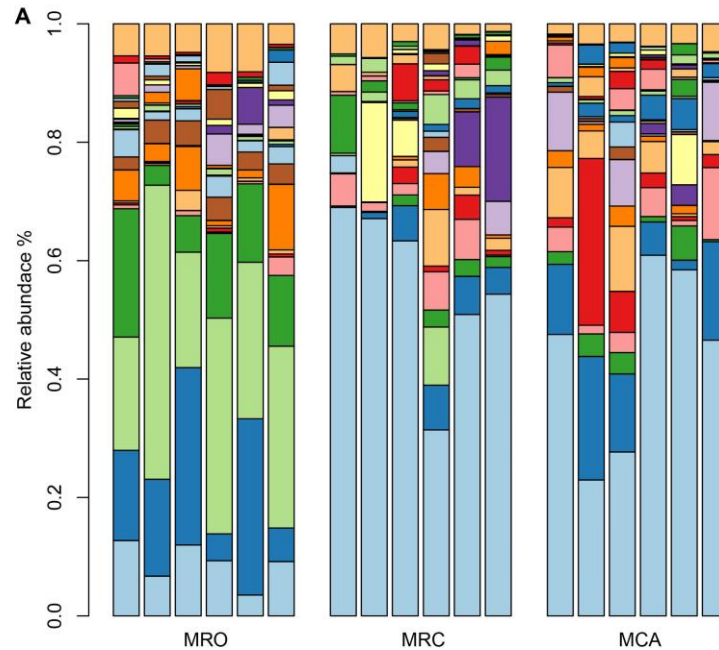

Figure S1. Cont.

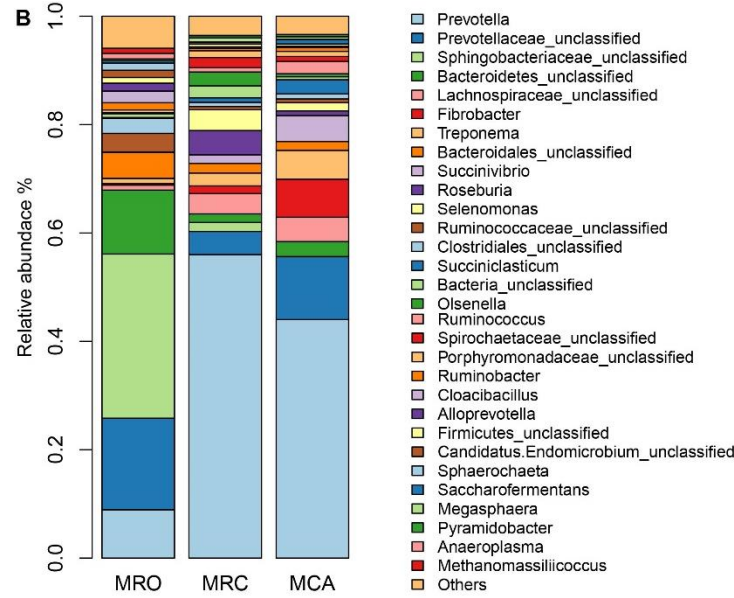

**Figure S1.** The rumen microbiome across three groups at genus level. Each bar shows the relative abundance of individual (A) or average (B) samples collected at MRO, MRC and MCA.

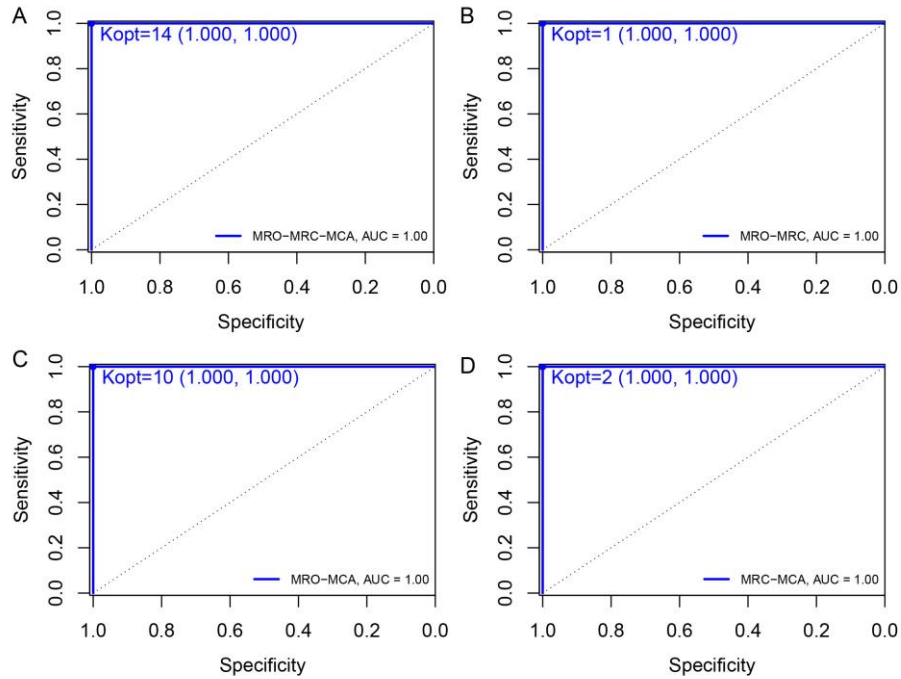

**Figure S2.** AUC curve of RandomForest classification model for differentiating MRO, MRC and MCA based on mean decrease accuracy: A: three groups; B: MRO vs MRC; C: MRO vs MCA; D: MRC vs MCA. The 'Kopt' shows the number of optimal variables fitted the AUCRF model. The values in parentheses are (specificity, sensitivity).

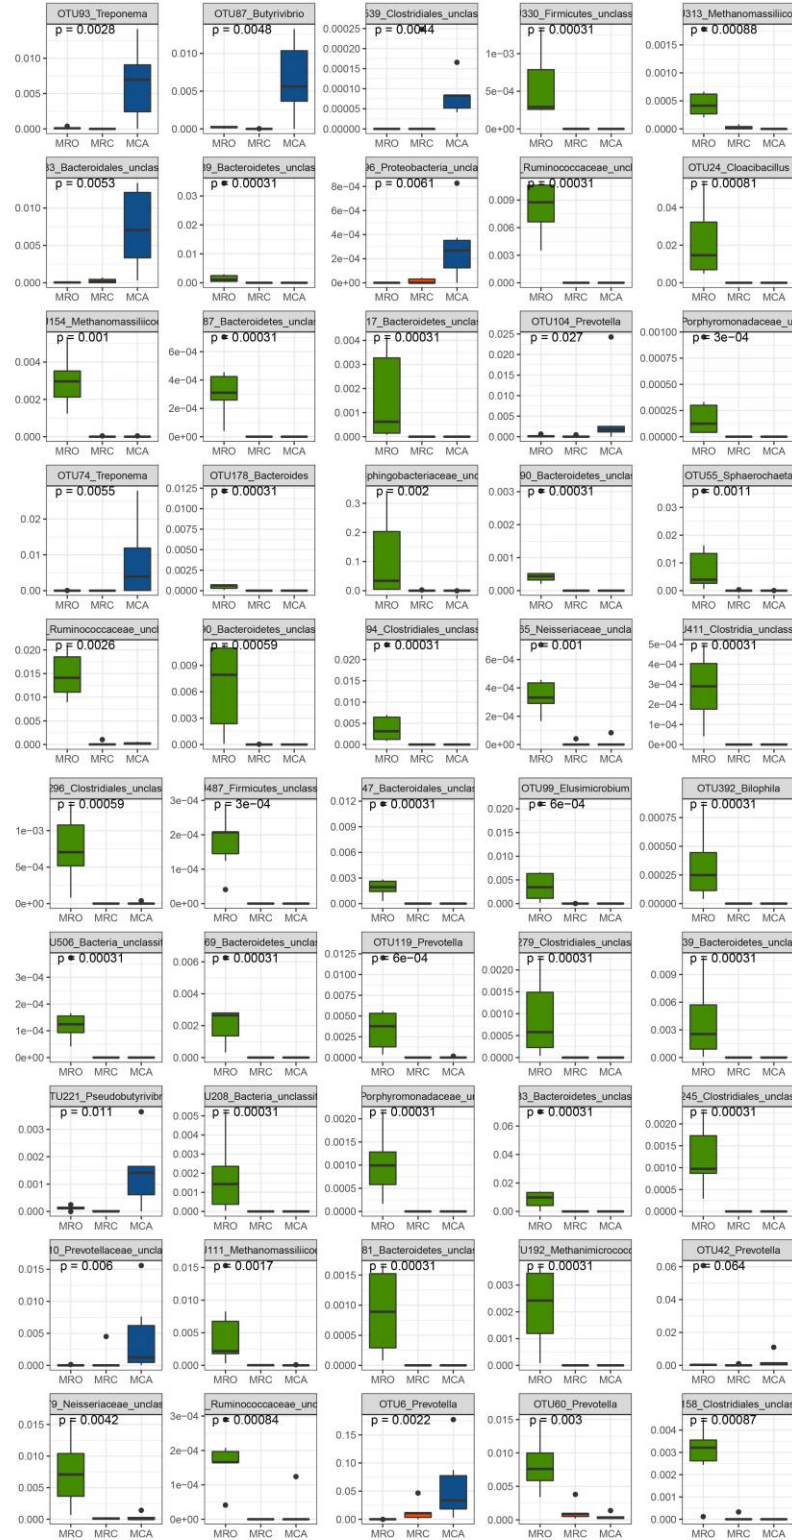

**Figure S3.** Top 50 features boxplots identified by AUCRF that differentiate MRO, MRC and MCA. The  $p$  values were calculated by using Kruskal-Wallis test. MRO = milk replacer, MRC = milk replacer + concentrate, MCA = milk replacer + concentrate + alfalfa.

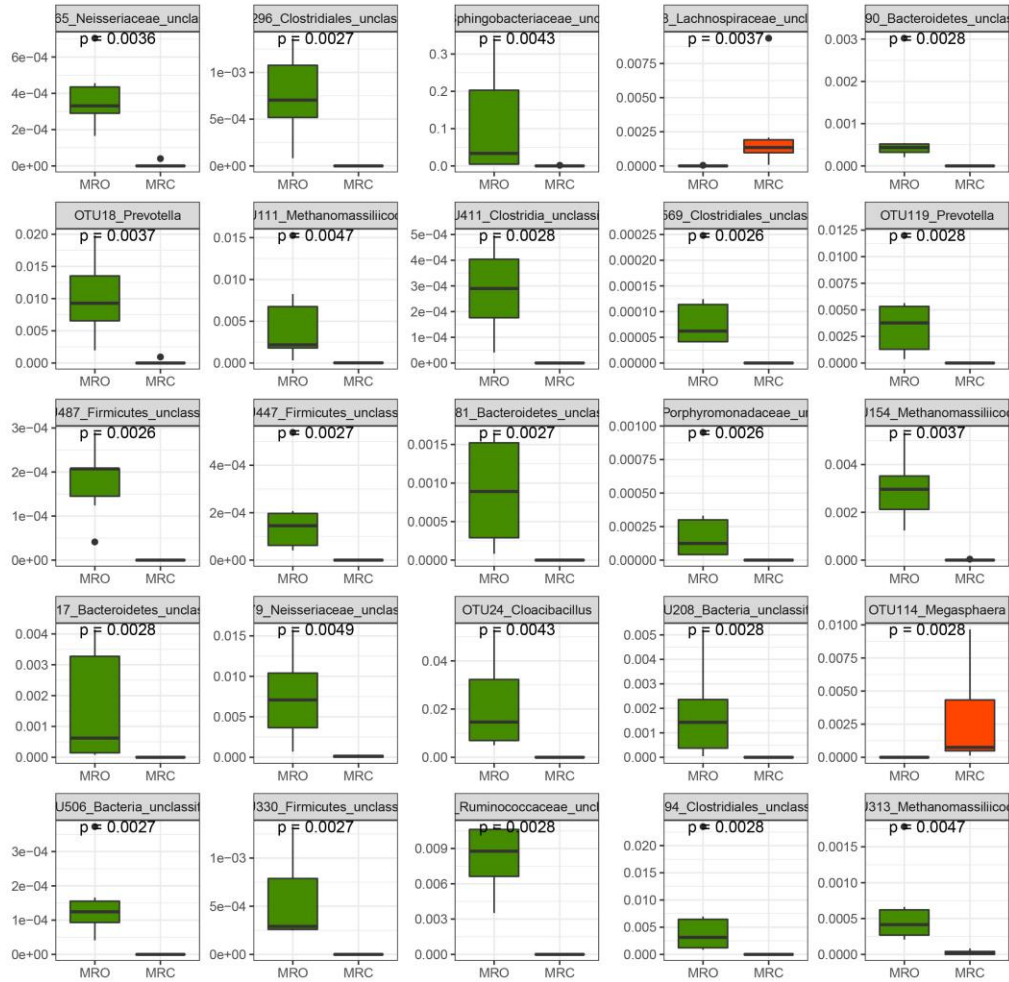

**Figure S4.** Top 25 predictors of pairwise AUCRF for differentiating MRO-MRC. The  $p$  values were calculated by using Kruskal-Wallis test. MRO = milk replacer, MRC = milk replacer + concentrate.



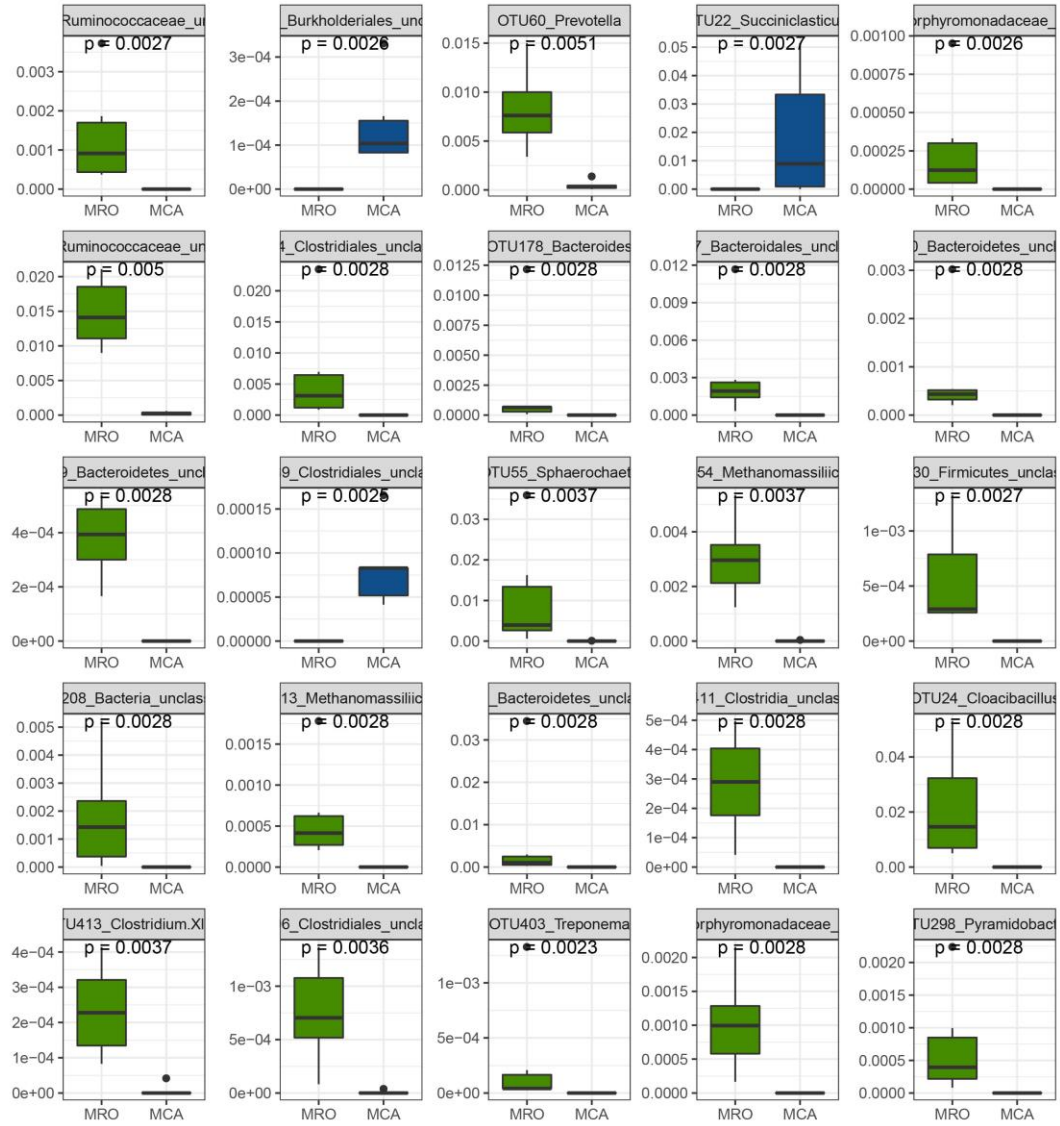

**Figure S5.** Top 25 predictors of pairwise AUCRF for differentiating MRO and MCA. The  $p$  values were calculated by using Kruskal–Wallis test. MRO = milk replacer, MCA = milk replacer + concentrate + alfalfa.

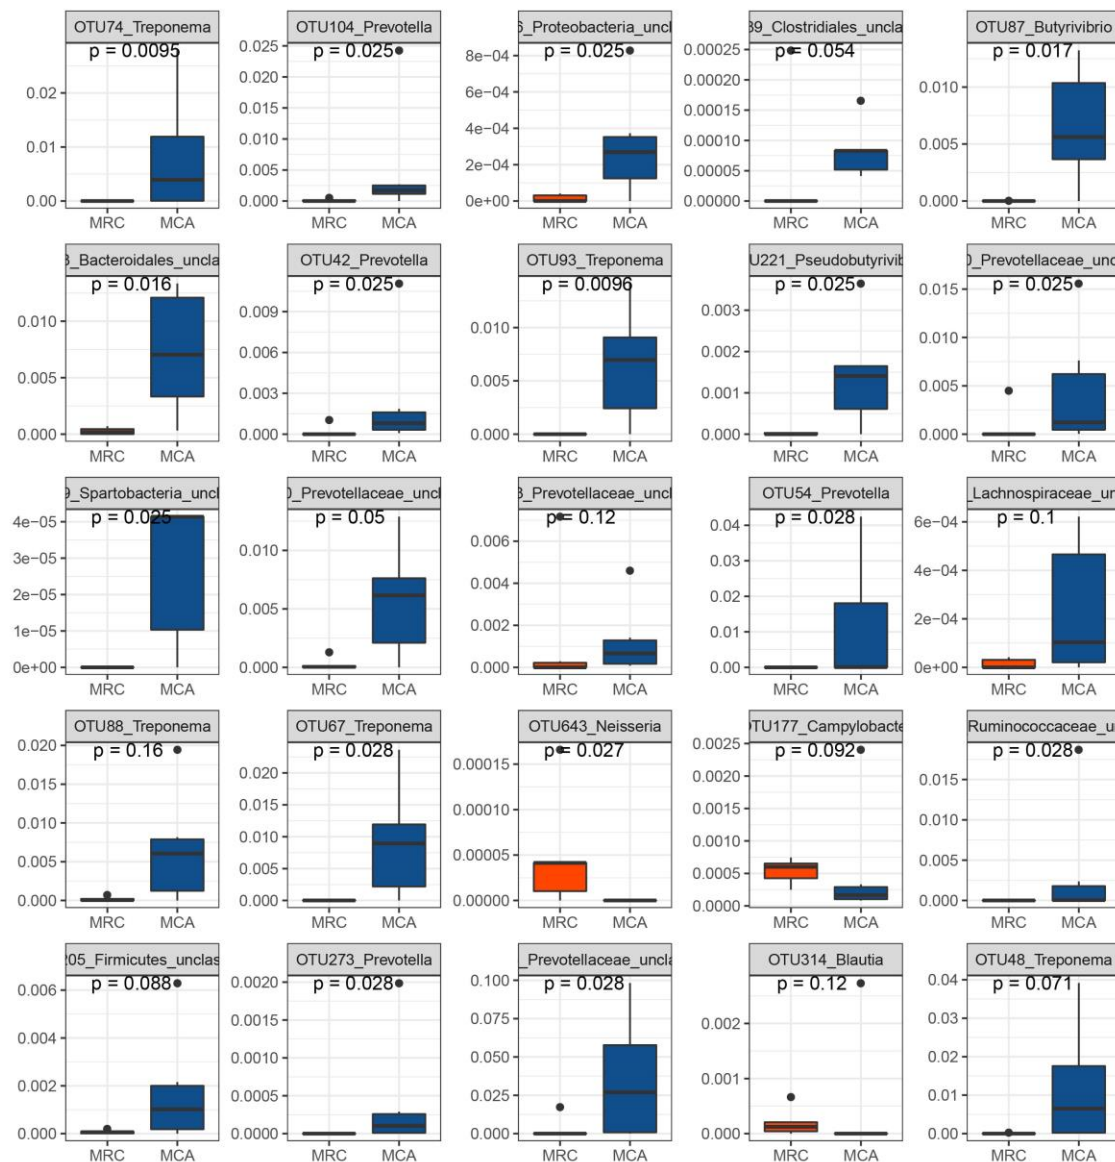

**Figure S6.** Top 25 predictors of pairwise AUCRF for differentiating MRC-MCA. The  $p$  values were calculated by using Kruskal-Wallis test. MRC = milk replacer + concentrate, MCA = milk replacer + concentrate + alfalfa.

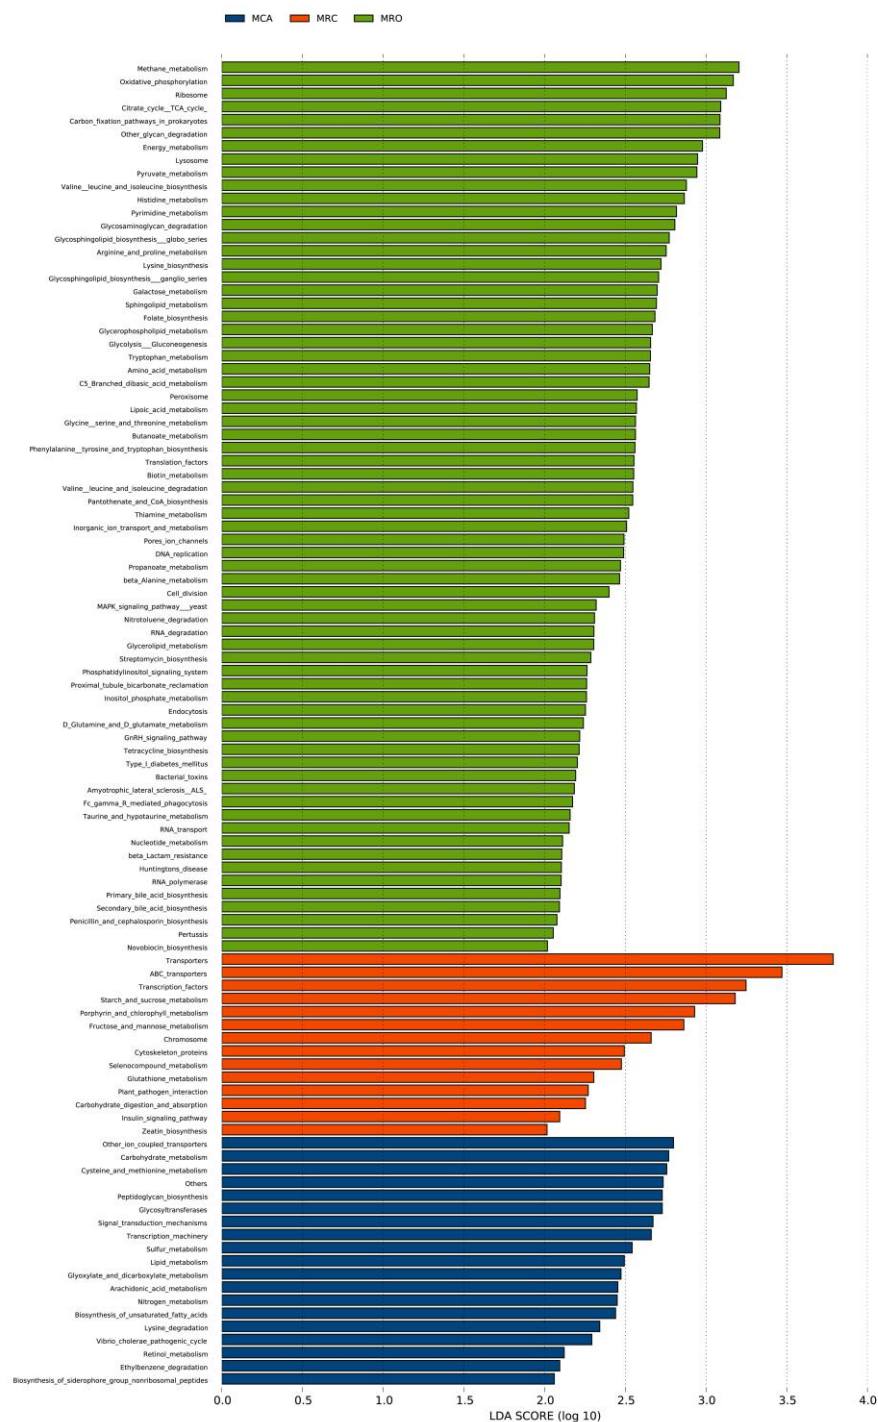

Figure S7. Predictive function analysis (levels 3 PICRUST)

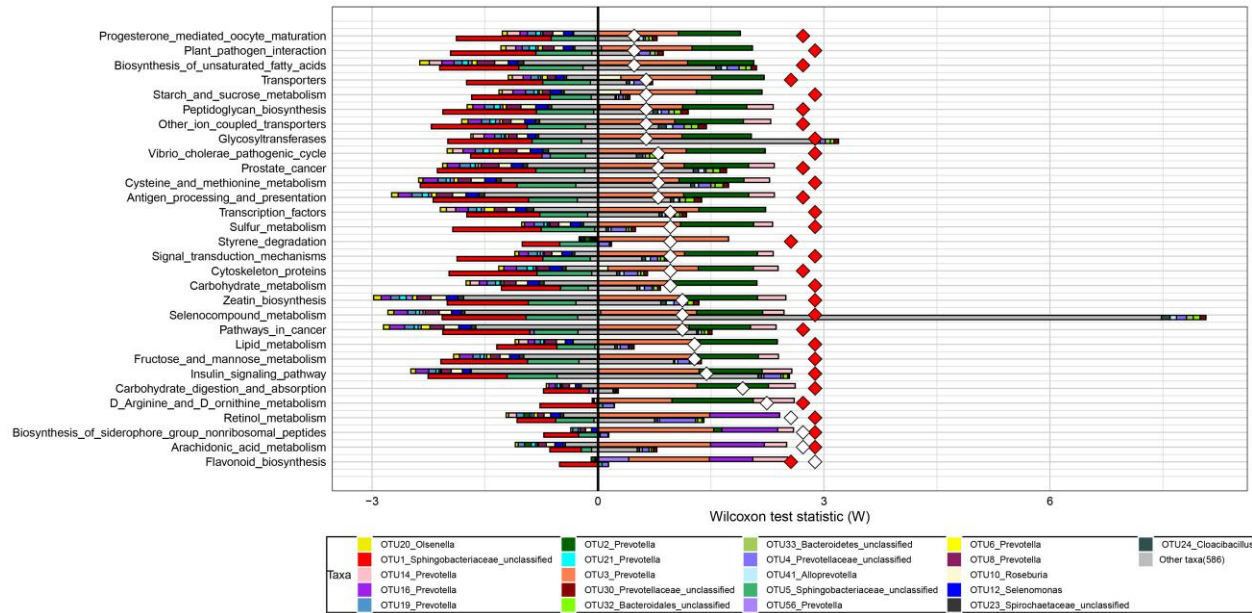

**Figure S8.** Comparing taxon-level contribution profiles of functional shifts in MRC rumen samples by FishTaco. Taxon-level shift contribution profiles for some case-associated (MRC case, MRO control) functional modules by FishTaco. The horizontal axis represents rank and statistic scores, and the vertical axis represents related pathways. For each functional pathway, the bar on the top-right of Y axis represents case-associated bacteria driving the enrichment in the functional module; the bar on the top-left of Y axis indicates case-associated bacteria attenuating functional shift; the bar on the bottom-right of Y axis represents bacteria depleted in control driving functional shift; the bar on the bottom-left of Y axis shows bacteria depleted in control attenuating functional shift. White diamonds represent bacterial-based functional shift scores. FishTaco:Functional Shifts' Taxonomic Contributors; MRO = milk replacer; MRC = milk replacer + concentrate

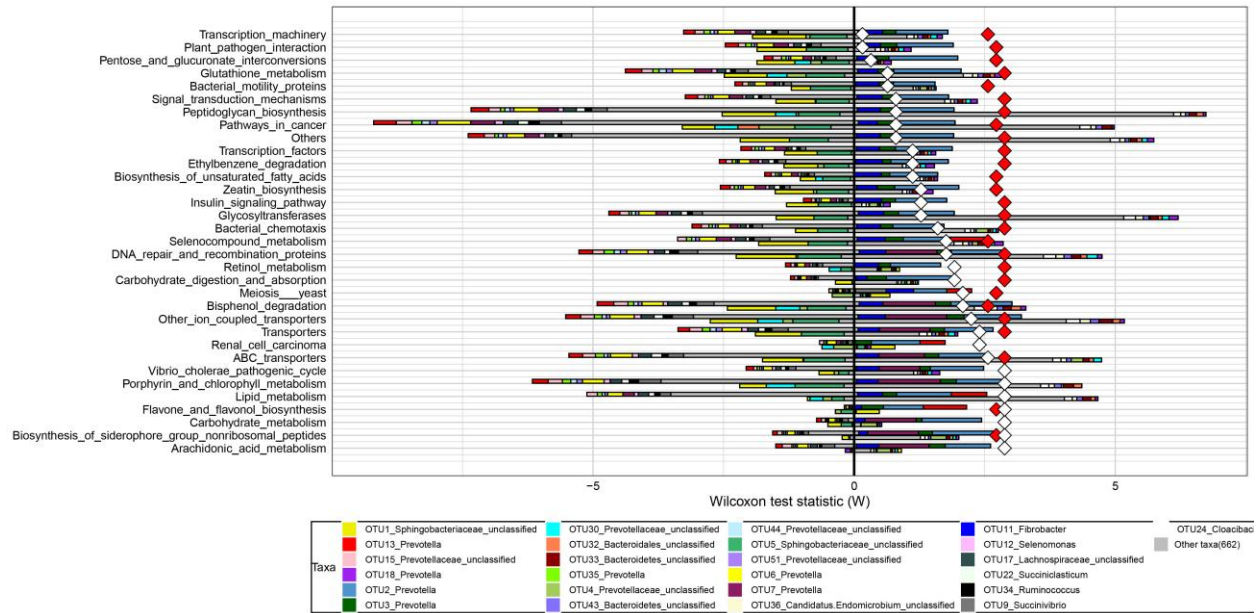

**Figure S9.** Comparing taxon-level contribution profiles of functional shifts in MCA rumen samples by FishTaco. Taxon-level shift contribution profiles for some case-associated (MCA case, MRO control) functional modules by Fish Taco. The horizontal axis represents rank and statistic scores, and the vertical axis represents related pathways. For each functional pathway, the bar on the top-right of Y axis represents case-associated bacteria driving the enrichment in the functional module; the bar on the top-left of Y axis indicates case-associated bacteria attenuating functional shift; the bar on the bottom-right of Y axis represents bacteria depleted in control driving functional shift; the bar on the bottom-left of Y axis shows bacteria depleted in control attenuating functional shift. White diamonds represent bacterial-based functional shift scores. MRO = milk replacer; MCA = milk replacer + concentrate + alfalfa; Fish Taco:Functional Shifts' Taxonomic Contributors;

## Supplemental File legends

File S1: Pearson correlation between top 50 species selected by RandomForest regression and major nutrient intake of goat kids (sheet 'ADFI') and fermentation parameters and pre-slaughter live weight of goat kids (sheet 'VFA'). We used heatmap color to label the pearson coefficients and pvalue. Also, the NCBI Blast results were shown in the table.

.

File S2: OTUs taxonomy, their NCBI Blast results and sequences

## Supplementary References

1. AOAC. Official methods of analysis. 15th ed. Washington, DC:Association of Official Analytical Chemists; 1990.
2. Xiaokang, L.; Xie, B.; Huang W.; Wang S.; Bi, Y.; Tao, H.; Cui K; Diao, Q.; Zhang N. Effects of early feeding on rumen and small intestine morphology of goat kids. *Acta Vet. Et Zootech. Sin.* **2019**, *50*, 1006–1015, doi: 10.11843/j.issn.0366-6964.2019.05.011.
3. Calle, M.L.; Urrea, V.; Boulesteix, A.L.; Malats, N. AUC-RF: a new strategy for genomic profiling with random forest. *Hum Hered* **2011**, *72*, 121–132, doi: 10.1159/000330778.
4. Langille, M.G.I.; Zaneveld, J.; Caporaso, J.G.; McDonald, D.; Knights, D.; Reyes, J.A.; Clemente, J.C.; Burkepile, D.E.; Thurber, R.L.V.; Knight, R.; et al. Predictive functional profiling of microbial communities using 16S rRNA marker gene sequences. *Nat Biotechnol* **2013**, *31*, 814, doi: 10.1038/nbt.2676.
